# Supplementary material for: ZIF-67-derived flower-like ZnIn2S4@CoS2 heterostructures for photocatalytic hydrogen production
Source: Royal Society of Chemistry journal article supplement (doi:10.1039/d1nj03625d), 2021-01-01
Supplement: d1nj03625d1.pdf [file d1nj03625d1.pdf]

## ZIF-67 - Derived Flower-like $\text{ZnIn}_2\text{S}_4@\text{CoS}_2$ Heterostructure for Photocatalytic Hydrogen Production

Xiuqing Xi<sup>#a</sup>, Qi Dang<sup>#a</sup>, Ganyu Wang<sup>a</sup>, Wenqian Chen<sup>\*a</sup>, Liang Tang<sup>\*a</sup>

a. Key Laboratory of Organic Compound Pollution Control Engineering (MOE), School of Environmental and Chemical Engineering, Shanghai University, Shanghai 200444, PR China

\*Corresponding author. E-mail addresses: [wenqianchen@shu.edu.cn](mailto:wenqianchen@shu.edu.cn) (W. Q. Chen), [tang1liang@shu.edu.cn](mailto:tang1liang@shu.edu.cn) (L. Tang)

# Equal contribution

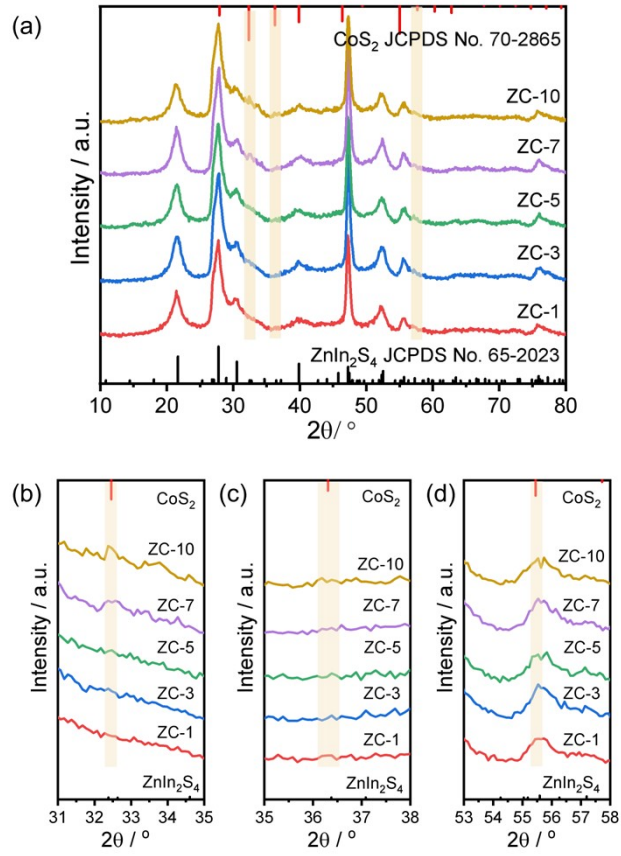

**Figure S1.** Enlarged XRD patterns of ZC-x at  $2\theta =$  (a)  $31-35^\circ$ , (b)  $35-38^\circ$ , and (c)  $53-58^\circ$ .

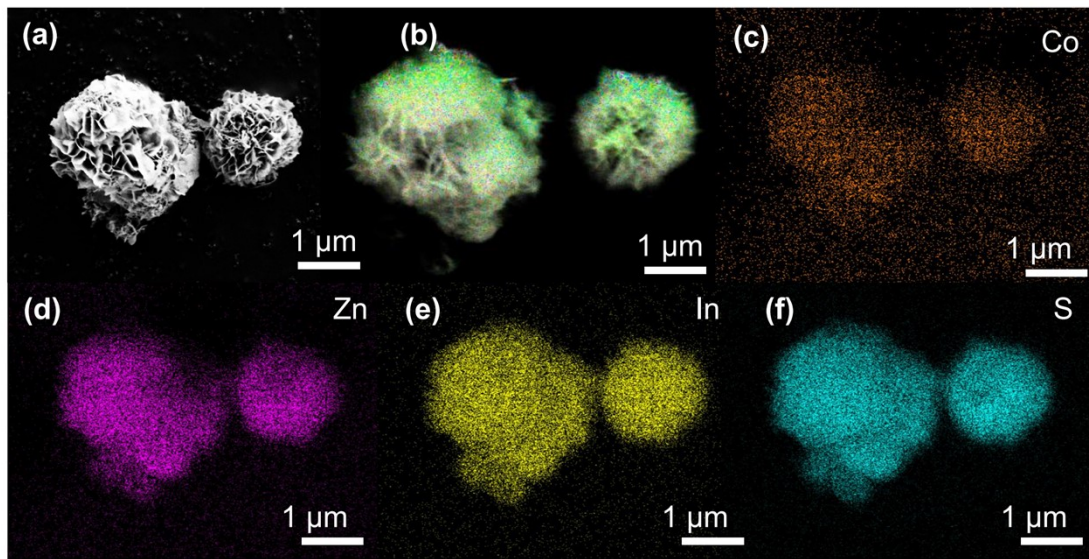

**Figure S2.** (a) SEM image and (b-f) element mappings of ZC-5.

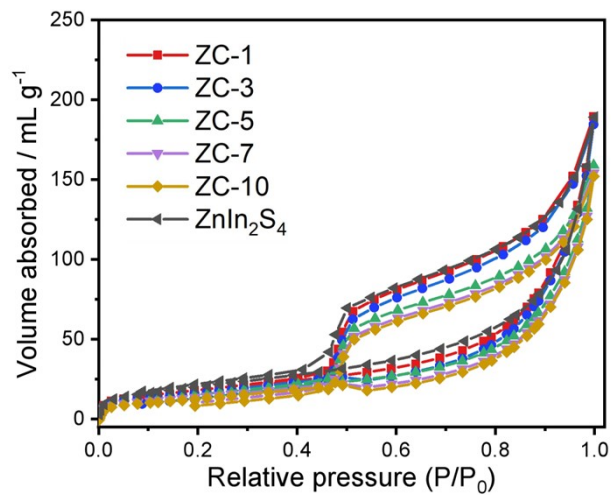

**Figure S3.** Brunauer-Emmet-Teller (BET) surface area of synthesized sample.

**Table S1.** BET surface area, mean pore size and pore volume of synthesized sample.

|                           | $S_{\text{BET}}$ ( $\text{m}^2/\text{g}$ ) | Mean pore size (nm) | Pore volume ( $\text{cm}^3/\text{g}$ ) |
|---------------------------|--------------------------------------------|---------------------|----------------------------------------|
| $\text{ZnIn}_2\text{S}_4$ | 75.7972                                    | 13.8633             | 0.2627                                 |
| ZC-1                      | 64.3987                                    | 16.5097             | 0.2658                                 |
| ZC-3                      | 57.8564                                    | 16.5461             | 0.2489                                 |
| ZC-5                      | 54.4725                                    | 16.2504             | 0.2213                                 |
| ZC-7                      | 51.5461                                    | 15.3542             | 0.2579                                 |
| ZC-10                     | 47.5694                                    | 16.1215             | 0.2148                                 |

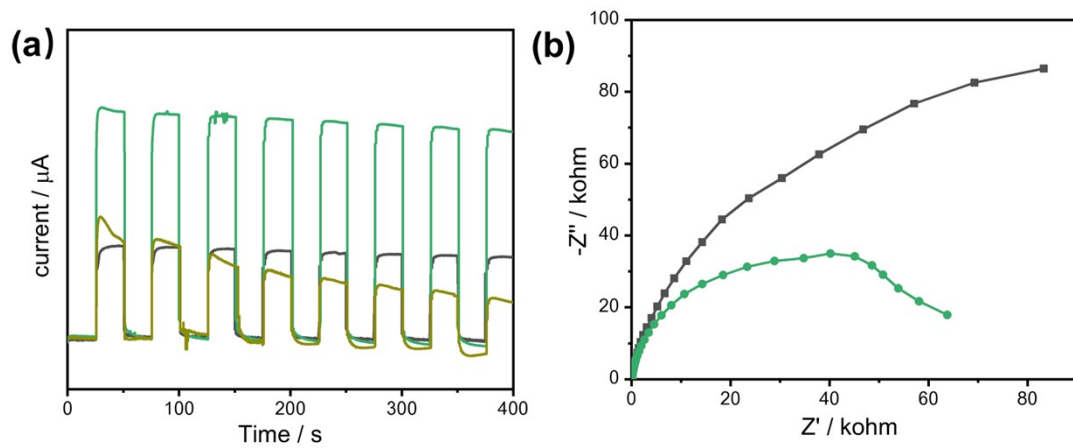

**Figure S4.** (a) Photocurrent response of ZnIn<sub>2</sub>S<sub>4</sub> (grey), CoS<sub>2</sub> (brown), and ZC-5 (green) under the irradiation of simulated sunlight; (b) EIS curves of ZnIn<sub>2</sub>S<sub>4</sub> (grey) and ZC-5 (green).

**Table S2.** ICP result for leaching amount of Zn<sup>2+</sup> and Co<sup>2+</sup>

| Testing ion      | Concentration of the testing ion in an aqueous solution (mg/L) |
|------------------|----------------------------------------------------------------|
| Co <sup>2+</sup> | 0.03524                                                        |
| Zn <sup>2+</sup> | 0.08142                                                        |

**Table S3** Summary of reported ZnIn<sub>2</sub>S<sub>4</sub>-based catalysts for photocatalytic hydrogen evolution.

| Catalyst                                           | Light source<br>(W/nm)       | Sacrificial<br>reagent                             | Cocatalyst | H <sub>2</sub><br>evolution<br>rate<br>( $\mu\text{mol/h/g}$ ) | Reference                                                 |
|----------------------------------------------------|------------------------------|----------------------------------------------------|------------|----------------------------------------------------------------|-----------------------------------------------------------|
| ZnIn <sub>2</sub> S <sub>4</sub> @CoS <sub>2</sub> | 300 Xe $\geq$<br>350         | TEOA                                               | -          | 879                                                            | This work                                                 |
| ZnS- ZnIn <sub>2</sub> S <sub>4</sub>              | 400 metal<br>halide ><br>420 | Glucose                                            | Pt         | 103                                                            | <i>Int. J. Hydrogen Energ.</i> , <b>2010</b> , 35, 7116.  |
| Cu- ZnIn <sub>2</sub> S <sub>4</sub>               | 300 Xe ><br>430              | Na <sub>2</sub> SO <sub>3</sub> /Na <sub>2</sub> S | Pt         | 757.5                                                          | <i>J. Phys. Chem. C</i> , <b>2008</b> , 112, 41, 16148.   |
| RGO/ ZnIn <sub>2</sub> S <sub>4</sub>              | 300 Xe ><br>420              | lactic acid                                        | -          | 817                                                            | <i>ACS Appl. Mater. Interfaces</i> <b>2014</b> , 6, 3483. |
| ZnIn <sub>2</sub> S <sub>4</sub> /Fluoropolymer    | 350 Xe ><br>250              | Na <sub>2</sub> SO <sub>3</sub> /Na <sub>2</sub> S | -          | 398                                                            | <i>Int. J. Hydrogen Energ.</i> , <b>2010</b> , 35, 6525.  |
| ZnIn <sub>2</sub> S <sub>4</sub> -MoS <sub>2</sub> | 150 Xe                       | Na <sub>2</sub> SO <sub>3</sub> /Na <sub>2</sub> S | -          | 111.6                                                          | <i>Catal. Sci. Technol.</i> , <b>2020</b> , 10, 2838.     |
